# Supplementary material for: Thermal Insulation Performance of Radiant Barrier Roofs for Rural Buildings in the Qinba Mountains
Source: Hindawi journal article supplement (doi:10.1155/2020/5612403), 2020-04-29
Supplement: f1 [file 5612403.f1.zip]

Archive with 8 entries (8 files):
- 5612403.f1/a.xlsx
- 5612403.f1/b.xlsx
- 5612403.f1/c.xlsx
- 5612403.f1/d.xlsx
- 5612403.f1/e.xlsx
- 5612403.f1/f.xlsx
- 5612403.f1/g.csv
- 5612403.f1/h.xlsx
