# Supplementary material for: Thermal Insulation Performance of Radiant Barrier Roofs for Rural Buildings in the Qinba Mountains
Source: Hindawi journal article supplement (doi:10.1155/2020/5612403), 2020-04-29
Supplement: f1 [file 5612403.f1.zip › 5612403.f1/a.xlsx]

## Sheet: Sheet1
time	temperature	huminity
08:00:00	27	80.7
09:00:00	27.6	80
10:00:00	28.1	78.4
11:00:00	28.5	77.9
12:00:00	29.2	77.3
13:00:00	29.7	73.4
14:00:00	30.8	70.9
15:00:00	31.7	68.1
16:00:00	31.8	67.2
17:00:00	32	66.9
18:00:00	32	66.9
19:00:00	31.7	68.3
20:00:00	31.4	70.4
21:00:00	30.7	72.2
22:00:00	30	73.4
23:00:00	29.4	74.3
00:00:00	29.2	75.2
01:00:00	29.1	76
02:00:00	28.9	76.5
03:00:00	28.7	77.1
04:00:00	28.4	77.8
05:00:00	27.9	77.8
06:00:00	27.7	78.3
07:00:00	27.6	79.1
08:00:00	27.9	79.5
