# Supplementary material for: Thermal Insulation Performance of Radiant Barrier Roofs for Rural Buildings in the Qinba Mountains
Source: Hindawi journal article supplement (doi:10.1155/2020/5612403), 2020-04-29
Supplement: f1 [file 5612403.f1.zip › 5612403.f1/b.xlsx]

## Sheet: Sheet1
Time	Total radiation	Scattered radiation
08:00:00	153.7	338.2
09:00:00	175.7	589.2
10:00:00	179.6	809.8
11:00:00	197.8	893.8
12:00:00	201.3	924.7
13:00:00	204.8	973.9
14:00:00	184.9	915.6
15:00:00	161.7	819
16:00:00	121.2	617.6
17:00:00	98.2	463
18:00:00	94.2	209.9
