# Supplementary material for: Thermal Insulation Performance of Radiant Barrier Roofs for Rural Buildings in the Qinba Mountains
Source: Hindawi journal article supplement (doi:10.1155/2020/5612403), 2020-04-29
Supplement: f1 [file 5612403.f1.zip › 5612403.f1/c.xlsx]

## Sheet: Sheet1
								2				1
time	tile up	tile bottom	Al.bottom	floor	ceiling			tile bottom	floor	ceiling	tile up	tile bottom	Al. bottom	floor	ceiling
08:00:00	29.7	27	27.4	28.4	27		08:00:00	27.9	29.2	29.3	29.7	27	27.4	28.4	27
09:00:00	31	30.6	28	28.4	28.2		09:00:00	30.5	29	29.3	31	30.6	28	28.4	28.2
10:00:00	38.3	38.1	29.8	28.5	28.3		10:00:00	37.8	29.1	29.2	38.3	38.1	29.8	28.5	28.3
11:00:00	41.5	41.5	30.9	28.7	28.3		11:00:00	40.9	29.3	29.3	41.5	41.5	30.9	28.7	28.3
12:00:00	48.8	47.8	32.6	29	28.9		12:00:00	47.1	29.7	29.5	48.8	47.8	32.6	29	28.9
13:00:00	53.6	51.2	34.1	29.4	29.5		13:00:00	50.4	30.2	29.8	53.6	51.2	34.1	29.4	29.5
14:00:00	54.5	52.2	35	29.8	30.2		14:00:00	51.8	30.8	30.1	54.5	52.2	35	29.8	30.2
15:00:00	53.9	51.8	35.6	30.1	30.7		15:00:00	50.7	31.5	30.5	53.9	51.8	35.6	30.1	30.7
16:00:00	48.3	46.5	35.4	30.5	30.8		16:00:00	45.9	32.2	30.8	48.3	46.5	35.4	30.5	30.8
17:00:00	42.2	41.4	34.2	30.6	30.7		17:00:00	40.7	32.4	31	42.2	41.4	34.2	30.6	30.7
18:00:00	40.1	39.1	34.3	30.8	30.9		18:00:00	38.5	32.7	31.1	40.1	39.1	34.3	30.8	30.9
19:00:00	35.8	36	33.5	30.9	30.6		19:00:00	36	32.8	31.4	35.8	36	33.5	30.9	30.6
20:00:00	32.3	33.1	32.5	31	30.5		20:00:00	33.4	32.9	31.5	32.3	33.1	32.5	31	30.5
21:00:00	29.4	31	31.5	30.9	30.1		21:00:00	30.6	32.8	31.5	29.4	31	31.5	30.9	30.1
22:00:00	28.2	29.8	30.8	30.9	29.8		22:00:00	29.5	32.5	31.4	28.2	29.8	30.8	30.9	29.8
23:00:00	28.1	29	30.2	30.7	29.4		23:00:00	29.2	32.2	31.3	28.1	29	30.2	30.7	29.4
00:00:00	28.3	29	30	30.5	29.3		00:00:00	29.2	32	31.2	28.3	29	30	30.5	29.3
01:00:00	28.2	28.5	29.7	30.4	29.2		01:00:00	29.1	31.7	31.2	28.2	28.5	29.7	30.4	29.2
02:00:00	28.2	28.2	29.5	30.3	29.2		02:00:00	28.9	31.4	31.1	28.2	28.2	29.5	30.3	29.2
03:00:00	27.4	27.9	29.1	30.2	28.9		03:00:00	28.4	31.3	31	27.4	27.9	29.1	30.2	28.9
04:00:00	27.2	27.4	28.6	29.9	28.7		04:00:00	28	31	30.9	27.2	27.4	28.6	29.9	28.7
05:00:00	26.4	26.7	28.1	29.6	28.3		05:00:00	27.5	30.8	30.7	26.4	26.7	28.1	29.6	28.3
06:00:00	25.4	26.3	28.1	29.6	28		06:00:00	26.8	30.5	30.6	25.4	26.3	28.1	29.6	28
07:00:00	26.9	26.5	28	29.5	28		07:00:00	27.7	30.3	30.5	26.9	26.5	28	29.5	28
08:00:00	31.4	29.1	28.2	29.3	28.2		08:00:00	31.9	30.2	30.4	31.4	29.1	28.2	29.3	28.2
