# Supplementary material for: Thermal Insulation Performance of Radiant Barrier Roofs for Rural Buildings in the Qinba Mountains
Source: Hindawi journal article supplement (doi:10.1155/2020/5612403), 2020-04-29
Supplement: f1 [file 5612403.f1.zip › 5612403.f1/d.xlsx]

## Sheet: Sheet1
	emissivity	Maximum indoor surface temperature
	0.1	29.4663
	0.3	30.0007
	0.5	31.0358
	0.7	31.6865
	0.9	32.0213
