# Supplementary material for: Thermal Insulation Performance of Radiant Barrier Roofs for Rural Buildings in the Qinba Mountains
Source: Hindawi journal article supplement (doi:10.1155/2020/5612403), 2020-04-29
Supplement: f1 [file 5612403.f1.zip › 5612403.f1/e.xlsx]

## Sheet: Sheet1
								1		2
	attic none	attic RB	bedroom RB	bedroom none				measure	CFX	test	CFX
08:00:00	29.1	28.4	27.4	29.4			08:00:00	27.6	28	28.4	28
09:00:00	29.7	30.1	28.1	29.4			09:00:00	28	29.4824	30.1	29.9587
10:00:00	30.3	33.4	28.4	29.4			10:00:00	28.7	30.025	33.4	32.2592
11:00:00	31.4	35.01	28.7	29.6			11:00:00	29.5	31.4241	35.01	35.1017
12:00:00	32	38.4	29.4	29.8			12:00:00	30.6	32.7048	38.4	38.2355
13:00:00	33.2	39.2	29.9	30.1			13:00:00	31.8	33.4058	39.2	40.3713
14:00:00	33.8	40.5	30.3	30.4			14:00:00	32.6	33.9986	40.5	41.5584
15:00:00	33.5	39.2	30.7	30.8			15:00:00	33.5	34.7743	39.2	40.8903
16:00:00	33.3	37.9	30.7	31			16:00:00	33.3	34.4101	37.9	40.3042
17:00:00	33.5	36.4	30.9	31.2			17:00:00	33.5	33.4042	36.4	39.0702
18:00:00	33.3	35.8	31	31.3			18:00:00	33.3	32.5921	35.8	37.5691
19:00:00	33	34.3	30.8	31.6			19:00:00	33	32.2673	34.3	35.6814
20:00:00	33	33.7	30.6	31.6			20:00:00	33	31.8407	33.7	33.6696
21:00:00	32.6	32.4	30.3	31.5			21:00:00	32.6	31.2804	32.4	32.191
22:00:00	32.5	31.8	29.9	31.4			22:00:00	32.5	30.8226	31.8	31.3178
23:00:00	32.2	31.3	29.5	31.3			23:00:00	32.2	30.6678	31.3	30.9948
00:00:00	32	31.3	29.5	31.3			00:00:00	32	30.6394	31.3	30.8087
01:00:00	31.8	31.1	29.4	31.2			01:00:00	31.8	29.6673	31.1	30.6648
02:00:00	31.6	30.9	29.4	31			02:00:00	31.6	29.57	30.9	30.4658
03:00:00	31.2	30.4	29.1	31			03:00:00	31.2	29.4015	30.4	29.9914
04:00:00	30.9	29.7	28.7	29.8			04:00:00	30.9	29.1633	29.7	29.3885
05:00:00	30.4	29.3	28.4	29.6			05:00:00	30.4	28.9536	29.3	28.7945
06:00:00	30.2	28.9	27.9	29.5			06:00:00	30.2	28.8947	28.9	28.6368
07:00:00	30	29.3	28	29.5			07:00:00	30	29.1078	29.3	29.0497
08:00:00	30.1	30.9	28.5	29.6			08:00:00	30.1	29.6287	30.9	30.0879
