# Supplementary material for: Thermal Insulation Performance of Radiant Barrier Roofs for Rural Buildings in the Qinba Mountains
Source: Hindawi journal article supplement (doi:10.1155/2020/5612403), 2020-04-29
Supplement: f1 [file 5612403.f1.zip › 5612403.f1/f.xlsx]

## Sheet: Sheet1
		R-value
	0	30.49
	0.5	29.7
	2	28.99
	3.5	28.98
	5	28.82
