# Supplementary material for: Thermal Insulation Performance of Radiant Barrier Roofs for Rural Buildings in the Qinba Mountains
Source: Hindawi journal article supplement (doi:10.1155/2020/5612403), 2020-04-29
Supplement: f1 [file 5612403.f1.zip › 5612403.f1/g.csv]

[Name]
Series 1 at /POINT:Point 1
[Data]
Time [ s ]	none	with RB		none	with RB
0	285.1	285.1		285.1	285.1
3600	278.31	281.4		278.32	281.4
7200	277.77	281.58		277.77	281.58
10800	277.52	281.93		277.52	281.94
14400	277.44	282.22		277.43	282.22				attic
18000	277.31	282.44		277.31	282.44				With RB	Without RB
21600	276.8	282.44		276.8	282.44			Maximum values	9.63	6.32
25200	276.9	282.44		276.9	282.43			Minimum values	8.21	2.84
28800	277.14	282.5		277.15	282.5
32400	278.1	282.59		278.1	282.59
36000	278.96	282.73		278.96	282.73
39600	279.39	282.73		279.4	282.73
43200	279.42	282.63		279.42	282.63
46800	278.83	282.51		278.83	282.51
50400	278.28	282.4		278.28	282.4
54000	277.99	282.21		278	282.21
57600	278	282.16		278	282.16
61200	277.92	282.09		277.92	282.09
64800	277.65	281.98		277.65	281.98
68400	277.36	281.89		277.36	281.89
72000	277.1	281.73		277.1	281.73
75600	277.07	281.74		277.07	281.75
79200	276.94	281.61		276.94	281.61
82800	276.54	281.47		276.54	281.47
86400	275.94	281.31		275.94	281.31
