# Supplementary material for: Thermal Insulation Performance of Radiant Barrier Roofs for Rural Buildings in the Qinba Mountains
Source: Hindawi journal article supplement (doi:10.1155/2020/5612403), 2020-04-29
Supplement: f1 [file 5612403.f1.zip › 5612403.f1/h.xlsx]

## Sheet: Sheet1
	North	roof	south	east	west				east	west	south	north	roof
0	-2.25	-0.3	-2.25	-2.25	-2.25			0	27.3	26.1	25.8	26.9	29.7
3600	-2.64	-0.7	-2.64	-2.64	-2.64			3600	27.7	28	27.1	28.6	31
7200	-2.84	-0.9	-2.84	-2.84	-2.84			7200	28.1	31.4	30.2	30.1	38
10800	-2.83	-0.9	-2.83	-2.83	-2.83			10800	28.4	34.5	33.1	31.4	41.5
14400	-2.62	-0.7	-2.62	-2.62	-2.62			14400	28.9	37.7	37.3	33.2	46.8
18000	-2.52	-0.6	-2.52	-2.52	-2.52			18000	29.3	40	40.2	35	48.6
21600	-2.52	-0.6	-2.52	-2.52	-2.52			21600	30	43.2	41.5	37.3	50.5
25200	-2.62	-0.7	-2.62	-2.62	-2.62			25200	30.8	47.1	41.3	38.3	49.9
28800	-1.73	1.08	-1.3	-1.23	-1.73			28800	31	45.9	40.6	38.3	44.3
32400	-0.58	3.3	0.21	0.04	-0.58			32400	30.7	45.6	37.8	38.6	41.2
36000	0.62	5.27	1.56	1.06	0.62			36000	30.9	46.5	40.4	38.7	40.1
39600	1.43	6.13	2.12	1.56	1.43			39600	30.9	41.6	38.2	38.8	35.8
43200	0.88	4.33	0.96	0.88	0.89			43200	30.7	37.9	36.8	37	32.3
46800	0.59	3.42	0.61	0.59	0.6			46800	30.3	34.5	34.2	34.9	29.4
50400	1.12	3.85	1.15	1.12	1.14			50400	30.1	32.1	32.1	33.6	28.2
54000	1.14	3.54	1.18	1.14	1.18			54000	29.8	30.5	30.7	32.6	28.1
57600	0.76	2.7	0.76	0.76	0.76			57600	29.7	29.6	29.7	31.9	28.3
61200	0.86	2.8	0.86	0.86	0.86			61200	29.6	29	29.1	31.3	28.2
64800	0.86	8	0.86	0.86	0.86			64800	29.4	28.5	28.6	30.7	28.2
68400	0.76	2.7	0.76	0.76	0.76			68400	29.2	28	28.1	30.1	27.4
72000	0.58	2.5	0.58	0.58	0.58			72000	28.9	27.4	27.5	29.7	27.2
75600	0.09	2	0.09	0.09	0.09			75600	28.5	26.8	27	29	26.4
79200	-0.3	1.6	-0.3	-0.3	-0.3			79200	28.5	26.1	26.4	28.3	25.4
82800	-0.2	1.7	-0.2	-0.2	-0.2			82800	28.4	26.3	26.1	28.2	26.9
